# Supplementary material
Source: PubMed Central journal article supplement (PMC7116055)
Supplement: EMS90767-supplement-ESM_4.pdf [file EMS90767-supplement-ESM_4.pdf]

ASSESSMENT OF GENDER-RELATED ATTRIBUTES – ESM 4

Table S1

*Model Fit for the First-Order Factor Models and Measurement Invariance across Men and Women for the Personality Subscale of the GERAS, for the three Subsamples: Study 1 Subset 1 (S1-1), Study 1 Subset 2 (S1-2), and Study 2 (S2)*

|             | Model fit |          |            |              | Model comparison |                |             |              |                |          |          |
|-------------|-----------|----------|------------|--------------|------------------|----------------|-------------|--------------|----------------|----------|----------|
|             | <i>df</i> | $\chi^2$ | <i>CFI</i> | <i>RMSEA</i> | <i>Model</i>     | $\Delta\chi^2$ | $\Delta df$ | $\Delta CFI$ | $\Delta RMSEA$ | <i>p</i> | Decision |
| <b>S1-1</b> |           |          |            |              |                  |                |             |              |                |          |          |
| Configural  | 320       | 749.47   | .950       | .061         |                  |                |             |              |                |          |          |
| Loadings    | 335       | 765.98   | .950       | .059         | To conf.         | 16.51          | 15          | <.01         | <.015          | .349     | Accept   |
| Residuals   | 390       | 980.50   | .931       | .064         | To load.         | 214.51         | 55          | >.01         | <.015          | <.001    | Reject   |
| Means       | 395       | 2062.13  | .806       | .107         | To resid.        | 1081.63        | 5           | >.01         | >.015          | <.001    | Reject   |
| <b>S1-2</b> |           |          |            |              |                  |                |             |              |                |          |          |
| Configural  | 320       | 768.16   | .949       | .062         |                  |                |             |              |                |          |          |
| Loadings    | 335       | 792.58   | .948       | .061         | To conf.         | 24.42          | 15          | <.01         | <.015          | .058     | Accept   |
| Residuals   | 390       | 1046.11  | .925       | .068         | To load.         | 253.53         | 55          | >.01         | <.015          | <.001    | Reject   |
| Means       | 395       | 2075.11  | .809       | .108         | To resid.        | 1029.00        | 5           | >.01         | >.015          | <.001    | Reject   |
| <b>S2</b>   |           |          |            |              |                  |                |             |              |                |          |          |
| Configural  | 320       | 765.67   | .905       | .077         |                  |                |             |              |                |          |          |
| Loadings    | 335       | 796.88   | .902       | .077         | To conf.         | 31.22          | 15          | <.01         | <.015          | .008     | Accept   |
| Residuals   | 390       | 977.82   | .875       | .080         | To load.         | 180.94         | 55          | >.01         | <.015          | <.001    | Reject   |
| Means       | 395       | 1890.22  | .682       | .127         | To resid.        | 912.39         | 5           | >.01         | >.015          | <.001    | Reject   |

*Note.* S1-1/2 = Subsets 1/2 from Study 1; S2 = Data from Study 2.

ASSESSMENT OF GENDER-RELATED ATTRIBUTES – ESM 4

Table S2

*Model Fit for the first-order Factor Models and Measurement Invariance across Men and Women for the Cognition Subscale of the GERAS, for the three Subsamples: Study 1 Subset 1 (S1-1), Study 1 Subset 2 (S1-2), and Study 2 (S2)*

|             | Model fit |          |            |              | Model comparison |                |             |              |                |          |          |
|-------------|-----------|----------|------------|--------------|------------------|----------------|-------------|--------------|----------------|----------|----------|
|             | <i>df</i> | $\chi^2$ | <i>CFI</i> | <i>RMSEA</i> | <i>Model</i>     | $\Delta\chi^2$ | $\Delta df$ | $\Delta CFI$ | $\Delta RMSEA$ | <i>p</i> | Decision |
| <b>S1-1</b> |           |          |            |              |                  |                |             |              |                |          |          |
| Configural  | 142       | 242.52   | .980       | .044         |                  |                |             |              |                |          |          |
| Loadings    | 152       | 251.78   | .981       | .042         | To conf.         | 9.26           | 10          | < .01        | < .015         | .508     | Accept   |
| Residuals   | 190       | 368.02   | .965       | .051         | To load.         | 116.24         | 38          | > .01        | < .015         | < .001   | Reject   |
| Means       | 194       | 1491.07  | .747       | .135         | To resid.        | 1123.05        | 4           | > .01        | > .015         | < .001   | Reject   |
| <b>S1-2</b> |           |          |            |              |                  |                |             |              |                |          |          |
| Configural  | 142       | 290.51   | .974       | .053         |                  |                |             |              |                |          |          |
| Loadings    | 152       | 295.10   | .975       | .051         | To conf.         | 4.59           | 10          | < .01        | < .015         | .917     | Accept   |
| Residuals   | 190       | 451.01   | .954       | .061         | To load.         | 155.91         | 38          | > .01        | < .015         | < .001   | Reject   |
| Means       | 194       | 1038.66  | .852       | .109         | To resid.        | 587.65         | 4           | > .01        | > .015         | < .001   | Reject   |
| <b>S2</b>   |           |          |            |              |                  |                |             |              |                |          |          |
| Configural  | 142       | 237.00   | .968       | .053         |                  |                |             |              |                |          |          |
| Loadings    | 152       | 252.09   | .966       | .053         | To conf.         | 15.09          | 10          | < .01        | < .015         | .129     | Accept   |
| Residuals   | 190       | 355.95   | .951       | .057         | To load.         | 83.86          | 38          | > .01        | < .015         | < .001   | Reject   |
| Means       | 194       | 745.91   | .814       | .110         | To resid.        | 409.96         | 4           | > .01        | > .015         | < .001   | Reject   |

*Note.* S1-1/2 = Subsets 1/2 from Study 1; S2 = Data from Study 2.

ASSESSMENT OF GENDER-RELATED ATTRIBUTES – ESM 4

Table S3

*Model Fit for the first-order Factor Models and Measurement Invariance across Men and Women for the Activities and Interest Subscale of the GERAS, for the three Subsamples: Study 1 Subset 1 (S1-1), Study 1 Subset 2 (S1-2), and Study 2 (S2)*

|            | Model fit |          |            |              | Model comparison |                |             |              |                |          |          |
|------------|-----------|----------|------------|--------------|------------------|----------------|-------------|--------------|----------------|----------|----------|
|            | <i>df</i> | $\chi^2$ | <i>CFI</i> | <i>RMSEA</i> | <i>Model</i>     | $\Delta\chi^2$ | $\Delta df$ | $\Delta CFI$ | $\Delta RMSEA$ | <i>p</i> | Decision |
| S1-1       |           |          |            |              |                  |                |             |              |                |          |          |
| Configural | 196       | 394.73   | .931       | .053         |                  |                |             |              |                |          |          |
| Loadings   | 208       | 437.13   | .920       | .055         | To conf.         | 42.41          | 12          | < .01        | < .015         | < .001   | Accept   |
| Residuals  | 252       | 593.65   | .881       | .061         | To load.         | 156.52         | 44          | > .01        | < .015         | < .001   | Reject   |
| Means      | 256       | 3428.33  | < .001     | .184         | To resid.        | 2834.68        | 4           | > .01        | > .015         | < .001   | Reject   |
| S1-2       |           |          |            |              |                  |                |             |              |                |          |          |
| Configural | 196       | 497.52   | .905       | .065         |                  |                |             |              |                |          |          |
| Loadings   | 208       | 535.97   | .897       | .066         | To conf.         | 38.45          | 12          | < .01        | < .015         | < .001   | Accept   |
| Residuals  | 252       | 663.90   | .870       | .067         | To load.         | 127.93         | 44          | > .01        | < .015         | < .001   | Reject   |
| Means      | 256       | 3752.36  | < .001     | .193         | To resid.        | 3088.45        | 4           | > .01        | > .015         | < .001   | Reject   |
| S2         |           |          |            |              |                  |                |             |              |                |          |          |
| Configural | 196       | 528.40   | .857       | .085         |                  |                |             |              |                |          |          |
| Loadings   | 208       | 584.87   | .838       | .088         | To conf.         | 56.47          | 12          | > .01        | < .015         | < .001   | Reject   |
| Residuals  | 252       | 772.94   | .776       | .094         | To load.         | 188.07         | 44          | > .01        | < .015         | < .001   | Reject   |
| Means      | 256       | 3523.50  | < .001     | .233         | To resid.        | 2750.56        | 4           | > .01        | > .015         | < .001   | Reject   |

*Note.* S1-1/2 = Subsets 1/2 from Study 1; S2 = Data from Study 2.
