# Supplementary material
Source: PubMed Central journal article supplement (PMC7116055)
Supplement: EMS90767-supplement-ESM_5.pdf [file EMS90767-supplement-ESM_5.pdf]

Studienkürzel: .....

VP-Nr.....

---

## **Fragebogen zur Selbsteinschätzung**

Der folgende Fragebogen erhebt verschiedene Bereiche, die Personen charakterisieren. Sie werden bei den einzelnen Bereichen jeweils gebeten, sich selbst auf einer 7-stufigen Skala einzuschätzen.

Um sich selbst einschätzen zu können trifft man meist einen Vergleich mit anderen Personen. Eventuell neigen Sie als Frau dazu, sich eher mit anderen Frauen zu vergleichen oder als Mann, sich eher mit anderen Männern zu vergleichen. Bitte treffen Sie Ihre Wahl stets so gut wie möglich im Vergleich zur Gesamtpopulation, also im Vergleich zu Männern UND Frauen, nicht nur im Vergleich zu Personen Ihres eigenen Geschlechts.

Einige der Fragen würden darüber hinaus in unterschiedlichen Kulturen eventuell verschieden beantwortet. Treffen Sie die Aussagen daher bitte so gut wie möglich im Vergleich zu der Kultur, der Sie sich vornehmlich zugehörig fühlen.

## Persönlichkeit

Bitte bewerten Sie folgende Eigenschaften auf einer Skala von 1 – 7, danach wie häufig diese Ihrer Meinung nach auf Sie zutreffen:

|                              | Nie |   |   |   |   |   | Immer |       | Wert |
|------------------------------|-----|---|---|---|---|---|-------|-------|------|
| Mitfühlend <sup>1</sup>      | 1   | 2 | 3 | 4 | 5 | 6 | 7     | F+    |      |
| Zärtlich <sup>2</sup>        | 1   | 2 | 3 | 4 | 5 | 6 | 7     | F+    |      |
| Dominant <sup>1</sup>        | 1   | 2 | 3 | 4 | 5 | 6 | 7     | M-    |      |
| Mutig <sup>2</sup>           | 1   | 2 | 3 | 4 | 5 | 6 | 7     | M+    |      |
| Liebevoll <sup>1</sup>       | 1   | 2 | 3 | 4 | 5 | 6 | 7     | F+    |      |
| Beherrschend <sup>2</sup>    | 1   | 2 | 3 | 4 | 5 | 6 | 7     | M-    |      |
| Analytisch <sup>2</sup>      | 1   | 2 | 3 | 4 | 5 | 6 | 7     | M neu |      |
| Vorsichtig <sup>2</sup>      | 1   | 2 | 3 | 4 | 5 | 6 | 7     | F neu |      |
| Prahlerisch <sup>1</sup>     | 1   | 2 | 3 | 4 | 5 | 6 | 7     | M-    |      |
| Risikofreudig <sup>1</sup>   | 1   | 2 | 3 | 4 | 5 | 6 | 7     | M neu |      |
| Fürsorglich <sup>2</sup>     | 1   | 2 | 3 | 4 | 5 | 6 | 7     | F+    |      |
| Empfindlich <sup>2</sup>     | 1   | 2 | 3 | 4 | 5 | 6 | 7     | F-    |      |
| Rational <sup>1</sup>        | 1   | 2 | 3 | 4 | 5 | 6 | 7     | M neu |      |
| Ängstlich <sup>1</sup>       | 1   | 2 | 3 | 4 | 5 | 6 | 7     | F-    |      |
| Familienbezogen <sup>1</sup> | 1   | 2 | 3 | 4 | 5 | 6 | 7     | F neu |      |
| Pragmatisch <sup>2</sup>     | 1   | 2 | 3 | 4 | 5 | 6 | 7     | M+    |      |
| Waghalsig <sup>2</sup>       | 1   | 2 | 3 | 4 | 5 | 6 | 7     | M-    |      |
| Warmherzig <sup>1</sup>      | 1   | 2 | 3 | 4 | 5 | 6 | 7     | F+    |      |
| Abenteuerlustig <sup>1</sup> | 1   | 2 | 3 | 4 | 5 | 6 | 7     | M+    |      |
| Feinfühlig <sup>2</sup>      | 1   | 2 | 3 | 4 | 5 | 6 | 7     | F+    |      |

<sup>1,2</sup> indicate test halves for calculations of  $r_{tt}$

## Kognition

Bitte bewerten Sie auf einer Skala von 1 – 7, wie leicht Ihnen Ihrer Meinung nach die Lösung folgender Problemstellungen fällt.

|                                                                                     | Gar nicht |   |   |   |   |   |   | Sehr | Wert |
|-------------------------------------------------------------------------------------|-----------|---|---|---|---|---|---|------|------|
|                                                                                     | 1         | 2 | 3 | 4 | 5 | 6 | 7 |      |      |
| Ein Computerprogramm zu schreiben <sup>1</sup>                                      | 1         | 2 | 3 | 4 | 5 | 6 | 7 | M    |      |
| Erstmals zu einer Adresse zu finden <sup>1</sup>                                    | 1         | 2 | 3 | 4 | 5 | 6 | 7 | M    |      |
| Wegbeschreibungen zu befolgen <sup>2</sup>                                          | 1         | 2 | 3 | 4 | 5 | 6 | 7 | M    |      |
| Sich Namen und Gesichter zu merken <sup>2</sup>                                     | 1         | 2 | 3 | 4 | 5 | 6 | 7 | F    |      |
| Die richtigen Worte zu finden, um einen bestimmten Inhalt auszudrücken <sup>1</sup> | 1         | 2 | 3 | 4 | 5 | 6 | 7 | F    |      |
| Texte zu formulieren <sup>2</sup>                                                   | 1         | 2 | 3 | 4 | 5 | 6 | 7 | F    |      |
| Synonyme für ein Wort zu finden, um Wiederholungen zu vermeiden <sup>2</sup>        | 1         | 2 | 3 | 4 | 5 | 6 | 7 | F    |      |
| Gleichungen zu lösen <sup>1</sup>                                                   | 1         | 2 | 3 | 4 | 5 | 6 | 7 | M    |      |
| Berechnungen im Alltag anzustellen <sup>2</sup>                                     | 1         | 2 | 3 | 4 | 5 | 6 | 7 | M    |      |
| Fremdwörter zu erklären <sup>1</sup>                                                | 1         | 2 | 3 | 4 | 5 | 6 | 7 | F    |      |
| Formeln zu verstehen <sup>2</sup>                                                   | 1         | 2 | 3 | 4 | 5 | 6 | 7 | M    |      |
| Kleine Veränderungen zu bemerken <sup>1</sup>                                       | 1         | 2 | 3 | 4 | 5 | 6 | 7 | F    |      |
| Sich an Ereignisse aus Ihrem eigenen Leben zu erinnern <sup>2</sup>                 | 1         | 2 | 3 | 4 | 5 | 6 | 7 | F    |      |
| Einen Weg, den Sie schon einmal gegangen sind, wiederzufinden <sup>1</sup>          | 1         | 2 | 3 | 4 | 5 | 6 | 7 | M    |      |

<sup>1,2</sup> indicate test halves for calculations of  $r_{tt}$

### Interessen & Aktivitäten

Bitte bewerten Sie auf einer Skala von 1 – 7, wie sehr Ihnen folgende Aktivitäten zusagen.

|                                                                                       | Gar nicht |   |   |   |   |   |   | Sehr | Wert |
|---------------------------------------------------------------------------------------|-----------|---|---|---|---|---|---|------|------|
|                                                                                       | 1         | 2 | 3 | 4 | 5 | 6 | 7 |      |      |
| Yoga <sup>2</sup>                                                                     | 1         | 2 | 3 | 4 | 5 | 6 | 7 | F    |      |
| Sportsendungen ansehen<br>(Boxen, Formel 1, Ballsportarten...) <sup>2</sup>           | 1         | 2 | 3 | 4 | 5 | 6 | 7 | M    |      |
| Bestimmte Sportarten betreiben<br>(Fußball, Basketball, Handball, etc.) <sup>1</sup>  | 1         | 2 | 3 | 4 | 5 | 6 | 7 | M    |      |
| Rhythmische Sportgymnastik <sup>1</sup>                                               | 1         | 2 | 3 | 4 | 5 | 6 | 7 | F    |      |
| Spaziergehen <sup>1</sup>                                                             | 1         | 2 | 3 | 4 | 5 | 6 | 7 | F    |      |
| Tanzen (klassische Standardtänze, Ballett,<br>Latin, Ausdruckstanz etc.) <sup>2</sup> | 1         | 2 | 3 | 4 | 5 | 6 | 7 | F    |      |
| Shopping <sup>2</sup>                                                                 | 1         | 2 | 3 | 4 | 5 | 6 | 7 | F    |      |
| Action Filme schauen <sup>1</sup>                                                     | 1         | 2 | 3 | 4 | 5 | 6 | 7 | M    |      |
| Mit FreundInnen telefonieren <sup>1</sup>                                             | 1         | 2 | 3 | 4 | 5 | 6 | 7 | F    |      |
| Paintball <sup>1</sup>                                                                | 1         | 2 | 3 | 4 | 5 | 6 | 7 | M    |      |
| Cartfahren <sup>2</sup>                                                               | 1         | 2 | 3 | 4 | 5 | 6 | 7 | M    |      |
| Liebesfilme sehen <sup>1</sup>                                                        | 1         | 2 | 3 | 4 | 5 | 6 | 7 | F    |      |
| Fitnessstudio (Gewichtheben, "pumpen") <sup>2</sup>                                   | 1         | 2 | 3 | 4 | 5 | 6 | 7 | M    |      |
| Tratschen <sup>2</sup>                                                                | 1         | 2 | 3 | 4 | 5 | 6 | 7 | F    |      |
| Bier trinken /saufen gehen <sup>1</sup>                                               | 1         | 2 | 3 | 4 | 5 | 6 | 7 | M    |      |
| Kartenspielen (Pokern) <sup>2</sup>                                                   | 1         | 2 | 3 | 4 | 5 | 6 | 7 | M    |      |

<sup>1,2</sup> indicate test halves for calculations of  $r_{tt}$

### **Self-assessment questionnaire**

The following questionnaire ascertains several areas that characterize people. Please rank yourself in the individual areas on a scale ranging from 1 to 7.

People commonly compare themselves with other people. As a woman, you may tend to compare yourself with another woman, whereas men may compare themselves with other men. Please try to consider the overall population, i.e., women AND men when making your choice.

Some of the questions might be answered differently in different cultures. Please make your statement according to the culture you primarily belong to.

**Personality**

Please rate the following characteristics on a scale ranging from 1 to 7, according to how often you think these apply to you.

|                                    | Never |   |   |   |   | Always |   | value |
|------------------------------------|-------|---|---|---|---|--------|---|-------|
| compassionate <sup>1</sup>         | 1     | 2 | 3 | 4 | 5 | 6      | 7 | F+    |
| tender <sup>2</sup>                | 1     | 2 | 3 | 4 | 5 | 6      | 7 | F+    |
| dominant <sup>1</sup>              | 1     | 2 | 3 | 4 | 5 | 6      | 7 | M-    |
| brave <sup>2</sup>                 | 1     | 2 | 3 | 4 | 5 | 6      | 7 | M+    |
| loving <sup>1</sup>                | 1     | 2 | 3 | 4 | 5 | 6      | 7 | F+    |
| controlling <sup>2</sup>           | 1     | 2 | 3 | 4 | 5 | 6      | 7 | M-    |
| analytical <sup>2</sup>            | 1     | 2 | 3 | 4 | 5 | 6      | 7 | M neu |
| careful <sup>2</sup>               | 1     | 2 | 3 | 4 | 5 | 6      | 7 | F neu |
| boastful <sup>1</sup>              | 1     | 2 | 3 | 4 | 5 | 6      | 7 | M-    |
| willing to take risks <sup>1</sup> | 1     | 2 | 3 | 4 | 5 | 6      | 7 | M neu |
| caring <sup>2</sup>                | 1     | 2 | 3 | 4 | 5 | 6      | 7 | F+    |
| sensitive <sup>2</sup>             | 1     | 2 | 3 | 4 | 5 | 6      | 7 | F-    |
| rational <sup>1</sup>              | 1     | 2 | 3 | 4 | 5 | 6      | 7 | M neu |
| anxious <sup>1</sup>               | 1     | 2 | 3 | 4 | 5 | 6      | 7 | F-    |
| famiily-oriented <sup>1</sup>      | 1     | 2 | 3 | 4 | 5 | 6      | 7 | F neu |
| pragmatic <sup>2</sup>             | 1     | 2 | 3 | 4 | 5 | 6      | 7 | M+    |
| reckless <sup>2</sup>              | 1     | 2 | 3 | 4 | 5 | 6      | 7 | M-    |
| warm-hearted <sup>1</sup>          | 1     | 2 | 3 | 4 | 5 | 6      | 7 | F+    |
| adventurous <sup>1</sup>           | 1     | 2 | 3 | 4 | 5 | 6      | 7 | M+    |
| delicate <sup>2</sup>              | 1     | 2 | 3 | 4 | 5 | 6      | 7 | F+    |

<sup>1,2</sup> indicate test halves for calculations of  $r_{tt}$

## Cognition

On a scale ranging from 1 (being very hard) to 7 (7 being very easy), how hard or easy would you say it would be for you to do the following tasks.

|                                                                        | hard |   |   |   |   |   | easy |   | value |
|------------------------------------------------------------------------|------|---|---|---|---|---|------|---|-------|
| to write a computer program <sup>1</sup>                               | 1    | 2 | 3 | 4 | 5 | 6 | 7    | M |       |
| to find an address for the first time <sup>1</sup>                     | 1    | 2 | 3 | 4 | 5 | 6 | 7    | M |       |
| to follow directions <sup>2</sup>                                      | 1    | 2 | 3 | 4 | 5 | 6 | 7    | M |       |
| to remember names and faces <sup>2</sup>                               | 1    | 2 | 3 | 4 | 5 | 6 | 7    | F |       |
| to find the right words to express a certain content <sup>1</sup>      | 1    | 2 | 3 | 4 | 5 | 6 | 7    | F |       |
| to phrase a text <sup>2</sup>                                          | 1    | 2 | 3 | 4 | 5 | 6 | 7    | F |       |
| to find synonyms for a word in order to avoid repetitions <sup>2</sup> | 1    | 2 | 3 | 4 | 5 | 6 | 7    | F |       |
| to solve equations <sup>1</sup>                                        | 1    | 2 | 3 | 4 | 5 | 6 | 7    | M |       |
| day-to-day calculations <sup>2</sup>                                   | 1    | 2 | 3 | 4 | 5 | 6 | 7    | M |       |
| to explain foreign words <sup>1</sup>                                  | 1    | 2 | 3 | 4 | 5 | 6 | 7    | F |       |
| to understand formulas <sup>2</sup>                                    | 1    | 2 | 3 | 4 | 5 | 6 | 7    | M |       |
| to notice small changes <sup>1</sup>                                   | 1    | 2 | 3 | 4 | 5 | 6 | 7    | F |       |
| remembering events from your own life <sup>2</sup>                     | 1    | 2 | 3 | 4 | 5 | 6 | 7    | F |       |
| to find a way again <sup>1</sup>                                       | 1    | 2 | 3 | 4 | 5 | 6 | 7    | M |       |

<sup>1,2</sup> indicate test halves for calculations of  $r_{tt}$

**Interests & Activities**

Please rate on a scale of 1 (not at all) to 7 (very much) how much **you** like the following activities.

|                                                                                    | Not at all |   |   |   |   | Very much |   | value |
|------------------------------------------------------------------------------------|------------|---|---|---|---|-----------|---|-------|
|                                                                                    | 1          | 2 | 3 | 4 | 5 | 6         | 7 |       |
| yoga <sup>2</sup>                                                                  | 1          | 2 | 3 | 4 | 5 | 6         | 7 | F     |
| watching sports on TV<br>(boxing, Formula 1, ball games...) <sup>2</sup>           | 1          | 2 | 3 | 4 | 5 | 6         | 7 | M     |
| doing certain sports<br>(soccer, basketball, handball, etc.) <sup>1</sup>          | 1          | 2 | 3 | 4 | 5 | 6         | 7 | M     |
| rhythmic gymnastics <sup>1</sup>                                                   | 1          | 2 | 3 | 4 | 5 | 6         | 7 | F     |
| going for a walk <sup>1</sup>                                                      | 1          | 2 | 3 | 4 | 5 | 6         | 7 | F     |
| dancing (classic standard dances, ballet, Latin, free<br>dance, etc.) <sup>2</sup> | 1          | 2 | 3 | 4 | 5 | 6         | 7 | F     |
| shopping <sup>2</sup>                                                              | 1          | 2 | 3 | 4 | 5 | 6         | 7 | F     |
| watching action movies <sup>1</sup>                                                | 1          | 2 | 3 | 4 | 5 | 6         | 7 | M     |
| talking on the phone with a friend <sup>1</sup>                                    | 1          | 2 | 3 | 4 | 5 | 6         | 7 | F     |
| paintball <sup>1</sup>                                                             | 1          | 2 | 3 | 4 | 5 | 6         | 7 | M     |
| driving go-carts <sup>2</sup>                                                      | 1          | 2 | 3 | 4 | 5 | 6         | 7 | M     |
| watching a romantic movie <sup>1</sup>                                             | 1          | 2 | 3 | 4 | 5 | 6         | 7 | F     |
| gym (weightlifting) <sup>2</sup>                                                   | 1          | 2 | 3 | 4 | 5 | 6         | 7 | M     |
| to gossip <sup>2</sup>                                                             | 1          | 2 | 3 | 4 | 5 | 6         | 7 | F     |
| drinking beer <sup>1</sup>                                                         | 1          | 2 | 3 | 4 | 5 | 6         | 7 | M     |
| playing cards (poker) <sup>2</sup>                                                 | 1          | 2 | 3 | 4 | 5 | 6         | 7 | M     |

<sup>1,2</sup> indicate test halves for calculations of  $r_{ttu}$
